# Supplementary material for: Simulation of Organic Liquid Products Deoxygenation by Multistage Countercurrent Absorber/Stripping Using CO2 as Solvent with Aspen-HYSYS: Thermodynamic Data Basis and EOS Modeling
Source: MDPI journal article supplement (doi:10.3390/molecules26144382), 2021-07-20
Supplement: s1 [file s1]

# Simulation of Organic Liquid Products Deoxygenation by Multistage Countercurrent Absorber/Stripping Using CO<sub>2</sub> as Solvent with Aspen-HYSYS: Thermodynamic Data Basis and EOS Modeling

Elinéia Castro Costa <sup>1</sup>, Welisson de Araújo Silva <sup>1</sup>, Eduardo Gama Ortiz Menezes <sup>2</sup>, Marcilene Paiva da Silva <sup>2</sup>, Vânia Maria Borges Cunha <sup>2</sup>, Andréia de Andrade Mâncio <sup>1</sup>, Marcelo Costa Santos <sup>1</sup>, Sílvio Alex Pereira da Mota <sup>1</sup>, Marilena Emmi Araújo <sup>2</sup> and Nélío Teixeira Machado <sup>1,2,3,\*</sup>

<sup>1</sup> Graduate Program of Natural Resources Engineering of Amazon, Rua Corrêa N° 1, Campus Profissional-UFPA, Belém 66075-110, Pará, Brazil; elineia.costa.ec@gmail.com (E.C.C.); wasilva89@hotmail.com (W.d.A.S.); dedeiaam@yahoo.com.br (A.d.A.M.); marceloenqui@bol.com.br (M.C.S.); silviomota@unifesspa.edu.br (S.A.P.d.M.)

<sup>2</sup> Graduate Program of Chemical Engineering, Rua Corrêa N° 1, Campus Profissional-UFPA, Belém 66075-110, Pará, Brazil; ortizegom@hotmail.com (E.G.O.M.); arci\_paiva@hotmail.com (M.P.d.S.); vaniacunha21@hotmail.com (V.M.B.C.); mearaújo@gmail.com (M.E.A.)

<sup>3</sup> Faculty of Sanitary and Environmental Engineering, Rua Corrêa N° 1, Campus Profissional-UFPA, Belém 66075-123, Pará, Brazil

\* Correspondence: proderna@ufpa.br or ppgeq@ufpa.br; Tel.: +55-91-984620325

**Table S1.** Chemical composition of OLP, obtained by thermal catalytic cracking of palm oil at 450 °C, 1.0 atmosphere, with 10% (wt.) Na<sub>2</sub>CO<sub>3</sub> [17], used to predict the thermo-physical (T<sub>b</sub>), critical properties (T<sub>c</sub>, P<sub>c</sub>, V<sub>c</sub>), and acentric factor ( ) of all the compounds present in OLP.

| Chemical Compounds       | Molecular Formula               | CAS Number    |
|--------------------------|---------------------------------|---------------|
| Metil-Cyclooctane        | C <sub>9</sub> H <sub>18</sub>  | 1502-38-1     |
| 1-Butyl-1-Cyclohexene    | C <sub>10</sub> H <sub>18</sub> | 3282-53-9     |
| 3-Isobutyl-1-Cyclohexene | C <sub>10</sub> H <sub>18</sub> | 4104-56-7     |
| 1-Decene                 | C <sub>10</sub> H <sub>20</sub> | 872-5-9       |
| Decane                   | C <sub>10</sub> H <sub>22</sub> | 124-18-5      |
| 1-Hexil-Cyclopentene     | C <sub>11</sub> H <sub>20</sub> | Not Available |
| 1-Undecene               | C <sub>11</sub> H <sub>22</sub> | 821-95-4      |
| (E)-2-Undecene           | C <sub>11</sub> H <sub>22</sub> | 693-61-8      |
| (Z)-2-Undecene           | C <sub>11</sub> H <sub>22</sub> | Not Available |
| Undecane                 | C <sub>11</sub> H <sub>24</sub> | 1120-21-4     |
| 1-Dodecene               | C <sub>12</sub> H <sub>24</sub> | 112-41-4      |
| 1-Tridecene              | C <sub>13</sub> H <sub>26</sub> | 2437-56-1     |
| Cyclotridecane           | C <sub>13</sub> H <sub>26</sub> | 295-02-3      |
| Tridecane                | C <sub>13</sub> H <sub>28</sub> | 629-50-5      |
| 1-Octyl-Cyclohexene      | C <sub>14</sub> H <sub>26</sub> | 15232-87-8    |
| 1-Tetradecene            | C <sub>14</sub> H <sub>28</sub> | 1120-36-1     |
| Cyclotetradecane         | C <sub>14</sub> H <sub>28</sub> | 295-17-0      |
| Tetradecane              | C <sub>14</sub> H <sub>30</sub> | 629-59-4      |
| 1-Nonyl-1-Cyclohexene    | C <sub>15</sub> H <sub>28</sub> | 15232-88-9    |
| 1-Pentadecene            | C <sub>15</sub> H <sub>30</sub> | 13360-61-7    |
| Nonylcyclohexane         | C <sub>15</sub> H <sub>30</sub> | 2883-02-5     |
| Cyclopentadecane         | C <sub>15</sub> H <sub>30</sub> | 295-48-7      |
| Pentadecane              | C <sub>15</sub> H <sub>32</sub> | 629-62-9      |

|                              |                                                |               |
|------------------------------|------------------------------------------------|---------------|
| (Z)-7-Hexadecene             | C <sub>16</sub> H <sub>32</sub>                | Not Available |
| (Z)-3-Hexadecene             | C <sub>16</sub> H <sub>32</sub>                | 34303-81-6    |
| 1-Hexadecene                 | C <sub>16</sub> H <sub>32</sub>                | 629-73-2      |
| Cyclohexadecane              | C <sub>16</sub> H <sub>32</sub>                | 295-65-8      |
| Hexadecane                   | C <sub>16</sub> H <sub>34</sub>                | 544-76-3      |
| 1-Heptadecene                | C <sub>17</sub> H <sub>34</sub>                | 6765-39-5     |
| (E)-9-Octadecene             | C <sub>18</sub> H <sub>36</sub>                | 5557-31-3     |
| Octadecane                   | C <sub>18</sub> H <sub>38</sub>                | 593-45-3      |
| (E)-9-Eicosene               | C <sub>20</sub> H <sub>40</sub>                | Not Available |
| (Z)-9-Tricosene              | C <sub>23</sub> H <sub>46</sub>                | 27519-2-4     |
| Caproic Acid                 | C <sub>6</sub> H <sub>12</sub> O <sub>2</sub>  | 142-62-1      |
| Glycerol                     | C <sub>3</sub> H <sub>8</sub> O <sub>3</sub>   | 56-81-5       |
| N-Nonanoic Acid              | C <sub>9</sub> H <sub>18</sub> O <sub>2</sub>  | 112-05-0      |
| Capric Acid                  | C <sub>10</sub> H <sub>20</sub> O <sub>2</sub> | 334-48-5      |
| Lauric Acid                  | C <sub>12</sub> H <sub>24</sub> O <sub>2</sub> | 143-07-7      |
| Myristic Acid                | C <sub>14</sub> H <sub>28</sub> O <sub>2</sub> | 544-63-8      |
| 2-Nonadecanone               | C <sub>19</sub> H <sub>38</sub> O              | 629-66-3      |
| Ethyl Palmitate              | C <sub>18</sub> H <sub>36</sub> O <sub>2</sub> | 628-97-7      |
| Octadecan-4-one              | C <sub>18</sub> H <sub>36</sub> O              | Not Available |
| Palmitic Acid                | C <sub>16</sub> H <sub>32</sub> O <sub>2</sub> | 57-10-3       |
| Z-10-Octadecene-1-ol Acetate | C <sub>20</sub> H <sub>38</sub> O <sub>2</sub> | Not Available |
| 1-Eicosanol                  | C <sub>20</sub> H <sub>42</sub> O              | 629-96-9      |
| Ethyl Oleate                 | C <sub>20</sub> H <sub>38</sub> O <sub>2</sub> | 111-62-6      |
| Linoleic Acid                | C <sub>18</sub> H <sub>32</sub> O <sub>2</sub> | 60-33-3       |
| Oleic Acid                   | C <sub>18</sub> H <sub>36</sub> O              | 112-80-1      |
| Stearic Acid                 | C <sub>18</sub> H <sub>36</sub> O <sub>2</sub> | 57-11-4       |
| 8-Octadecanone               | C <sub>18</sub> H <sub>36</sub> O              | 79246-41-6    |

**Table S2.** Estimated/Predicted values of thermo-physical ( $T_b$ ), critical properties ( $T_c$ ,  $P_c$ ,  $V_c$ ), and acentric factor ( $\omega$ ) of chemical compounds present in OLP obtained by thermal-catalytic cracking of palm oil, as described by Mâncio et al. [17].

| Chemical Compounds       | $T_b$<br>[K]         | $T_c$<br>[K]         | $P_c$<br>[bar]      | $V_c$<br>[cm <sup>3</sup> /mol] | $\omega$            |
|--------------------------|----------------------|----------------------|---------------------|---------------------------------|---------------------|
| Metil-Cyclooctane        | 446.111 <sup>b</sup> | 639.678 <sup>c</sup> | 24.958 <sup>b</sup> | 468.72 <sup>c</sup>             | 0.3794 <sup>h</sup> |
| 1-Butyl-1-Cyclohexene    | 457.679 <sup>b</sup> | 593.736 <sup>c</sup> | 24.124 <sup>b</sup> | 515.94 <sup>c</sup>             | 1.0313 <sup>h</sup> |
| 3-Isobutyl-1-Cyclohexene | 439.701 <sup>b</sup> | 588.010 <sup>c</sup> | 23.996 <sup>b</sup> | 518.05 <sup>c</sup>             | 0.7739 <sup>h</sup> |
| 1-Decene                 | 440.000 <sup>a</sup> | 615.724 <sup>c</sup> | 22.200 <sup>a</sup> | 584.00 <sup>a</sup>             | 0.4869 <sup>f</sup> |
| Decane                   | 447.200 <sup>a</sup> | 617.70 <sup>a</sup>  | 21.100 <sup>a</sup> | 594.89 <sup>c</sup>             | 0.4920 <sup>a</sup> |
| 1-Hexil-Cyclopentene     | 476.755 <sup>b</sup> | 583.790 <sup>c</sup> | 22.342 <sup>b</sup> | 522.98 <sup>c</sup>             | 1.6624 <sup>h</sup> |
| 1-Undecene               | 466.000 <sup>a</sup> | 636.280 <sup>c</sup> | 20.073 <sup>d</sup> | 638.00 <sup>d</sup>             | 0.5313 <sup>f</sup> |
| (E)-2-Undecene           | 469.338 <sup>c</sup> | 639.873 <sup>c</sup> | 16.116 <sup>d</sup> | 689.90 <sup>d</sup>             | 0.5356 <sup>f</sup> |
| (Z)-2-Undecene           | 469.338 <sup>c</sup> | 639.873 <sup>c</sup> | 16.116 <sup>d</sup> | 689.90 <sup>d</sup>             | 0.5356 <sup>f</sup> |
| Undecane                 | 469.080 <sup>a</sup> | 639.00 <sup>a</sup>  | 19.500 <sup>a</sup> | 651.17 <sup>c</sup>             | 0.5300 <sup>a</sup> |
| 1-Dodecene               | 486.200 <sup>a</sup> | 655.158 <sup>c</sup> | 19.300 <sup>a</sup> | 694.60 <sup>d</sup>             | 0.5747 <sup>f</sup> |
| 1-Tridecene              | 505.000 <sup>a</sup> | 672.609 <sup>c</sup> | 17.047 <sup>d</sup> | 751.20 <sup>d</sup>             | 0.6171 <sup>f</sup> |
| Cyclotridecane           | 507.685 <sup>b</sup> | 739.275 <sup>c</sup> | 23.726 <sup>e</sup> | 641.50 <sup>e</sup>             | 0.2895 <sup>h</sup> |
| Tridecane                | 508.620 <sup>a</sup> | 675.00 <sup>a</sup>  | 16.800 <sup>a</sup> | 763.73 <sup>c</sup>             | 0.6170 <sup>a</sup> |
| 1-Octyl-Cyclohexene      | 494.340 <sup>b</sup> | 673.018 <sup>c</sup> | 20.150 <sup>b</sup> | 741.06 <sup>c</sup>             | 0.5579 <sup>h</sup> |
| 1-Tetradecene            | 524.200 <sup>a</sup> | 688.836 <sup>c</sup> | 15.785 <sup>d</sup> | 807.80 <sup>d</sup>             | 0.6585 <sup>f</sup> |
| Cyclotetradecane         | 522.830 <sup>b</sup> | 756.412 <sup>c</sup> | 17.625 <sup>b</sup> | 689.50 <sup>e</sup>             | 0.1939 <sup>h</sup> |
| Tetradecane              | 523.000 <sup>a</sup> | 693.00 <sup>a</sup>  | 16.470 <sup>c</sup> | 830.00 <sup>a</sup>             | 0.6430 <sup>a</sup> |

|                              |                      |                      |                      |                      |                     |
|------------------------------|----------------------|----------------------|----------------------|----------------------|---------------------|
| 1-Nonyl-1-Cyclohexene        | 539.343 <sup>b</sup> | 689.216 <sup>c</sup> | 15.891 <sup>b</sup>  | 797.34 <sup>c</sup>  | 0.8912 <sup>h</sup> |
| 1-Pentadecene                | 541.540 <sup>a</sup> | 703.998 <sup>c</sup> | 14.657 <sup>d</sup>  | 864.40 <sup>d</sup>  | 0.6990 <sup>f</sup> |
| Nonylcyclohexane             | 545.000 <sup>a</sup> | 728.078 <sup>c</sup> | 16.056 <sup>b</sup>  | 814.74 <sup>c</sup>  | 0.5544 <sup>h</sup> |
| Cyclopentadecane             | 536.929 <sup>b</sup> | 772.366 <sup>c</sup> | 20.755 <sup>e</sup>  | 737.50 <sup>e</sup>  | 0.2864 <sup>h</sup> |
| Pentadecane                  | 540.000 <sup>a</sup> | 708.00 <sup>a</sup>  | 14.800 <sup>a</sup>  | 876.29 <sup>c</sup>  | 0.6860 <sup>a</sup> |
| (Z)-7-Hexadecene             | 560.902 <sup>c</sup> | 734.435 <sup>c</sup> | 15.046 <sup>d</sup>  | 1112.2 <sup>d</sup>  | 0.7426 <sup>f</sup> |
| (Z)-3-Hexadecene             | 560.902 <sup>c</sup> | 734.435 <sup>c</sup> | 15.046 <sup>d</sup>  | 1112.2 <sup>d</sup>  | 0.7426 <sup>f</sup> |
| 1-Hexadecene                 | 547.200 <sup>a</sup> | 703.998 <sup>c</sup> | 13.647 <sup>d</sup>  | 921.00 <sup>d</sup>  | 0.7387 <sup>f</sup> |
| Cyclohexadecane              | 550.118 <sup>b</sup> | 787.290 <sup>c</sup> | 19.475 <sup>e</sup>  | 785.50 <sup>e</sup>  | 0.2816 <sup>h</sup> |
| Hexadecane                   | 554.000 <sup>a</sup> | 723.00 <sup>a</sup>  | 14.000 <sup>a</sup>  | 932.57 <sup>c</sup>  | 0.7170 <sup>a</sup> |
| 1-Heptadecene                | 559.440 <sup>c</sup> | 731.631 <sup>c</sup> | 12.737 <sup>d</sup>  | 977.60 <sup>d</sup>  | 0.7776 <sup>f</sup> |
| (E)-9-Octadecene             | 585.099 <sup>c</sup> | 758.833 <sup>c</sup> | 13.052 <sup>d</sup>  | 1225.4 <sup>d</sup>  | 0.8194 <sup>f</sup> |
| Octadecane                   | 589.300 <sup>a</sup> | 747.000 <sup>a</sup> | 12.950 <sup>a</sup>  | 1045.13 <sup>c</sup> | 0.8178 <sup>f</sup> |
| (E)-9-Eicosene               | 591.816 <sup>b</sup> | 769.696 <sup>c</sup> | 11.429 <sup>d</sup>  | 1338.6 <sup>d</sup>  | 0.8933 <sup>f</sup> |
| (Z)-9-Tricosene              | 620.891 <sup>b</sup> | 800.665 <sup>c</sup> | 9.508 <sup>d</sup>   | 1508.4 <sup>d</sup>  | 0.9993 <sup>f</sup> |
| Caproic Acid                 | 477.000 <sup>a</sup> | 660.200 <sup>a</sup> | 33.800 <sup>a</sup>  | 413.00 <sup>a</sup>  | 0.7300 <sup>a</sup> |
| Glycerol                     | 563.150 <sup>a</sup> | 850.000 <sup>a</sup> | 75.000 <sup>a</sup>  | -                    | 0.5130 <sup>a</sup> |
| N-Nonanoic Acid              | 527.150 <sup>a</sup> | 710.700 <sup>a</sup> | 25.140 <sup>a</sup>  | 562.89 <sup>b</sup>  | 0.7720 <sup>a</sup> |
| Capric Acid                  | 530.000 <sup>a</sup> | 722.100 <sup>a</sup> | 22.500 <sup>a</sup>  | 618.65 <sup>b</sup>  | 0.8060 <sup>a</sup> |
| Lauric Acid                  | 571.000 <sup>a</sup> | 742.68 <sup>b</sup>  | 19.142 <sup>b</sup>  | 730.17 <sup>b</sup>  | 0.8689 <sup>g</sup> |
| Myristic Acid                | 588.311 <sup>b</sup> | 762.508 <sup>b</sup> | 16.356 <sup>b</sup>  | 841.69 <sup>b</sup>  | 0.9615 <sup>g</sup> |
| 2-Nonadecanone               | 396.280 <sup>e</sup> | 552.195 <sup>e</sup> | 26.625 <sup>e</sup>  | 557.50 <sup>e</sup>  | 0.5575 <sup>h</sup> |
| Ethyl Palmitate              | 615.350 <sup>a</sup> | 822.849 <sup>e</sup> | 13.577 <sup>b</sup>  | 1065.50 <sup>c</sup> | 0.8980 <sup>g</sup> |
| Octadecan-4-one              | 373.400 <sup>e</sup> | 52.357 <sup>e</sup>  | 29.473 <sup>e</sup>  | 501.50 <sup>e</sup>  | 0.5698 <sup>h</sup> |
| Palmitic Acid                | 612.150 <sup>a</sup> | 780.381 <sup>b</sup> | 14.177 <sup>b</sup>  | 953.21 <sup>b</sup>  | 1.0281 <sup>g</sup> |
| Z-10-Octadecene-1-ol Acetate | 723.65 <sup>d</sup>  | 896.254 <sup>e</sup> | 12.6987 <sup>c</sup> | 1158.27 <sup>b</sup> | 0.9638 <sup>h</sup> |
| 1-Eicosanol                  | 742.70 <sup>d</sup>  | 808.000 <sup>i</sup> | 11.500 <sup>i</sup>  | 1176.23 <sup>c</sup> | 0.9100 <sup>i</sup> |
| Ethyl Oleate                 | 717.050 <sup>e</sup> | 888.080 <sup>e</sup> | 12.699 <sup>b</sup>  | 1163.90 <sup>c</sup> | 0.9009 <sup>g</sup> |
| Linoleic Acid                | 626.791 <sup>b</sup> | 798.356 <sup>b</sup> | 12.935 <sup>b</sup>  | 1032.51 <sup>b</sup> | 0.9969 <sup>g</sup> |
| Oleic Acid                   | 626.807 <sup>b</sup> | 797.504 <sup>b</sup> | 12.684 <sup>b</sup>  | 1048.62 <sup>b</sup> | 1.0449 <sup>g</sup> |
| Stearic Acid                 | 626.824 <sup>b</sup> | 796.648 <sup>b</sup> | 12.440 <sup>b</sup>  | 1064.73 <sup>b</sup> | 1.0932 <sup>g</sup> |
| 8-Octadecanone               | 372.700 <sup>e</sup> | 525.993 <sup>e</sup> | 30.933 <sup>e</sup>  | 492.50 <sup>e</sup>  | 0.5555 <sup>h</sup> |

a-Yaws; b-Constantinou-Gani; c-Marrero-Gani; d-Marrero-Pardillo; e-Joback; f-Han-Peng; g-Ceriani; h-Vetere; i-Nikitin.
